# Supplementary material for: Effective dynamics of nucleosome configurations at the yeast PHO5 promoter
Source: eLife. 2021 Mar 5;10:e58394. doi: 10.7554/eLife.58394 (PMC8004102; doi:10.7554/eLife.58394)
Supplement: Figure 1—source data 1. [file elife-58394-fig1-data1.xlsx]

## Sheet: Sheet1
Occurences of nucleosome configurations measured by Brown et al. (2013)
Number of occurrences of each of the eight promoter nucleosome configurations from electron microscopy of single PHO5 gene molecules in Brown et al. (2013). All cells are grown in high-phosphate conditions which leads to a repressed PHO5 promoter in wild-type. pho80 knockout mutants simulate phosphate starvation and exhibit the activated PHO5 promoter state.
Promoter state	Mutant	Strain	Conf. 1	Conf. 2	Conf. 3	Conf. 4	Conf. 5	Conf. 6	Conf. 7	Conf. 8
Repressed	wild type	yM2.1	125	25	28	9	7	2	9	5
Weakly activated	pho4[85-99] pho80Δ tata	yM89.1	61	8	57	16	28	2	19	12
Activated	pho80Δ	yM8.14	15	4	36	13	43	5	37	50
