# Supplementary material for: Effective dynamics of nucleosome configurations at the yeast PHO5 promoter
Source: eLife. 2021 Mar 5;10:e58394. doi: 10.7554/eLife.58394 (PMC8004102; doi:10.7554/eLife.58394)
Supplement: Figure 4—source data 1. [file elife-58394-fig4-data1.xlsx]

## Sheet: parameter_values_and_errors_con
Fitted parameter values of constitutive processes and time scale with error estimates
Rate values of constitutive processes (names with relative values on log10 scale) for each of the satisfactory models after the combined fit to all data sets in stage 3 shown in Figure 4. The time scale is given in 1/h and also on log10 scale and needs to be added to each individual relative rate value. We also tested the sensitivity of our models with respect to rate changes in certain direction…
model	time_scale	time_scale_err_p	time_scale_err_m	con_1	value_1	value_1_err_p	value_1_err_m	con_2	value_2	value_2_err_p	value_2_err_m	con_3	value_3	value_3_err_p	value_3_err_m	con_4	value_4	value_4_err_p	value_4_err_m
65171	-1.119	0.2892	-0.3901	D	0.2289	0.02333	-0.02332	D1-4	-2	1.358	-Inf	S2*	0.8687	0.09865	-0.0964	S3-4	0.4481	0.1233	-0.1205
65166	-1.049	0.2673	-0.3251	D	0.2272	0.02546	-0.02517	D1-4	-1.225	0.8466	-Inf	S2*	0.8518	0.09403	-0.09403	S32	0.2362	0.1039	-0.1039
8166	-0.3426	0.09611	-0.0897	D	0.109	0.02939	-0.04827	A1	-0.5593	0.3746	-0.6435	S2*	1.035	0.07049	-0.07049	S32	0.4073	0.08891	-0.08891
27443	-0.7041	0.139	-0.1406	A	0	0	0	D	0.4415	0.1328	-0.1313	S2*	1.396	0.1573	-0.1555	S32	0.3106	0.1649	-0.163
27448	-0.7668	0.1426	-0.1443	A	0	0	0	D	0.4966	0.1348	-0.1333	S2*	1.47	0.1645	-0.1626	S3-4	0.5696	0.2056	-0.2032
61116	-2	1.006	-Inf	D	0.2262	0.02359	-0.02387	D1-3	-2	1.342	-Inf	S2*	0.9305	0.06498	-0.06703	S32	-0.04207	0.157	-0.1625
61121	-2	0.9721	-Inf	D	0.2258	0.02731	-0.02341	D1-3	-2	1.389	-Inf	S2*	0.9297	0.06865	-0.07025	S3-4	0.1048	0.191	-0.1955
