# Supplementary material for: Effective dynamics of nucleosome configurations at the yeast PHO5 promoter
Source: eLife. 2021 Mar 5;10:e58394. doi: 10.7554/eLife.58394 (PMC8004102; doi:10.7554/eLife.58394)
Supplement: Figure 4—source data 2. [file elife-58394-fig4-data2.xlsx]

## Sheet: parameter_values_and_errors_reg
Fitted parameter values of regulated processes with error estimates
Rate values of regulated processes (name with relative values for repressed, weakly activated and activated state on log10 scale) for each of the satisfactory models after the combined fit to all data sets in stage 3 shown in Figure 4. The time scale is given in 1/h and also on log10 scale and needs to be added to each individual relative rate value. We also tested the sensitivity of our models w…
model	time_scale	time_scale_err_p	time_scale_err_m	reg	rep_value	rep_value_err_p	rep_value_err_m	weakly_act_value	weakly_act_value_err_p	weakly_act_value_err_m	act_value	act_value_err_p	act_value_err_m
65171	-1.119	0.2892	-0.3901	A	0.7993	0.05103	-0.04986	0.4098	0.04456	-0.04007	0	0	0
65166	-1.049	0.2673	-0.3251	A	0.8001	0.05103	-0.04929	0.4084	0.04053	-0.04007	0	0	0
8166	-0.3426	0.09611	-0.0897	A	0.9384	0.05995	-0.05791	0.459	0.04496	-0.04496	0	0	0
27443	-0.7041	0.139	-0.1406	A2	1.42	0.1387	-0.1371	0.9366	0.1512	-0.1495	0.4312	0.1914	-0.1892
27448	-0.7668	0.1426	-0.1443	A2	1.477	0.1403	-0.1387	0.9993	0.1514	-0.1497	0.5061	0.1827	-0.1806
61116	-2	1.006	-Inf	A	0.7892	0.04817	-0.04762	0.4068	0.04053	-0.04007	0	0	0
61121	-2	0.9721	-Inf	A	0.787	0.04817	-0.04762	0.4064	0.04007	-0.04007	0	0	0
