# Supplementary material for: Effective dynamics of nucleosome configurations at the yeast PHO5 promoter
Source: eLife journal article supplement (doi:10.7554/elife.58394), 2021-03-05
Supplement: supp [file elife-58394-supp-v1.zip]

Models

3459  
5.323075  
5.88

A  
A1  
A2-1  
A7-3  
A6-4  
A8-5  
A2  
A3-1  
A7-2  
A5-4  
A8-6  
A3  
A4-1  
A6-2  
A5-3  
A8-7  
D  
D1  
D1-2  
D3-7  
D4-6  
D5-8  
D2  
D1-3  
D2-7  
D4-5  
D6-8  
D3  
D1-4  
D2-6  
D3-5  
D7-8  
S  
S2\*  
S21  
S2-3  
S6-5  
S23  
S4-3  
S6-7  
S12  
S3-2  
S5-6  
S32  
S3-4  
S7-6

Processes

 $\log_{10}$  relative rate value

0.5

0

-0.5

-1

-1.5

-2
