# Supplementary material for: Effective dynamics of nucleosome configurations at the yeast PHO5 promoter
Source: eLife. 2021 Mar 5;10:e58394. doi: 10.7554/eLife.58394 (PMC8004102; doi:10.7554/eLife.58394)
Supplement: Table 1—source data 1. [file elife-58394-table1-data1.xlsx]

## Sheet: Sheet1
Restriction enzyme accessibility of independent biological replicates in phosphate starved cells (in %)
position	restriction enzyme	wt rep 1	wt rep 2	sticky N-3 mutant 1 rep 1	sticky N-3 mutant 1 rep 2	sticky N-3 mutant 2 rep 1	sticky N-3 mutant 2 rep 2
N-2	ClaI	63	65	42	45	44	51
N-3	HhaI	57	60	40	21	42	31
