# Supplementary figures and images for: Effective dynamics of nucleosome configurations at the yeast PHO5 promoter
Source: eLife journal article supplement (doi:10.7554/elife.58394), 2021-03-05

## Group 1

65171, max = 0.043 / h

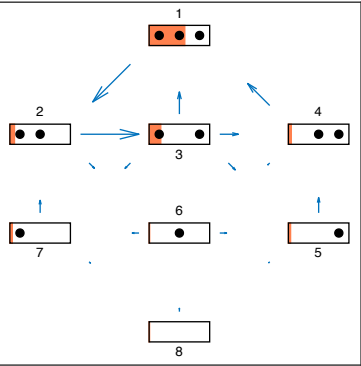

## Group 2

8166, max = 0.428 / h

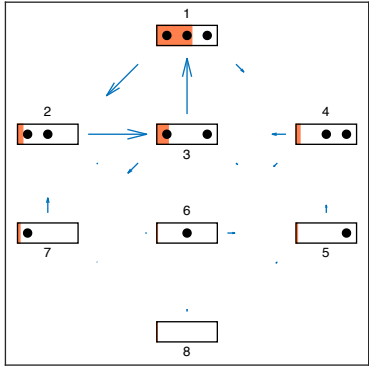

### Group 3

61116, max = 0.010 / h

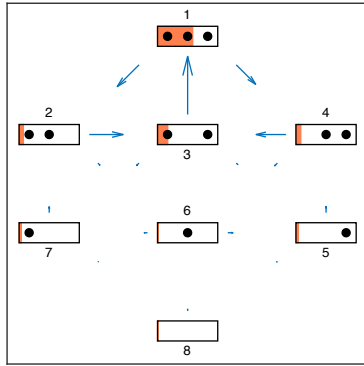

65166, max = 0.049 / h

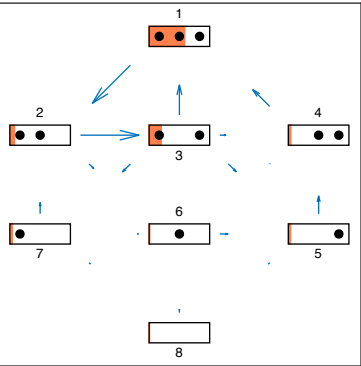

27443, max = 0.587 / h

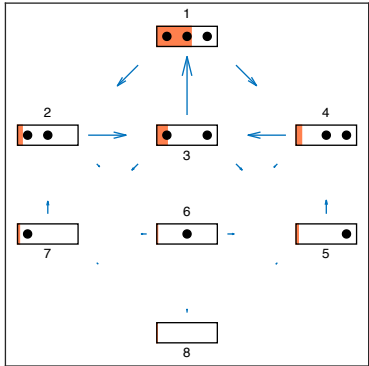

61121, max = 0.010 / h

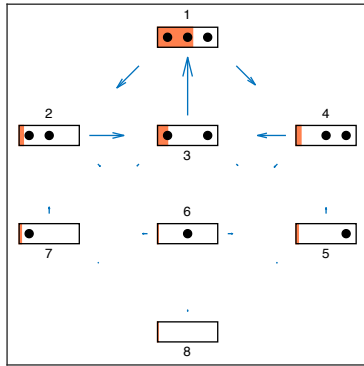

27448, max = 0.580 / h

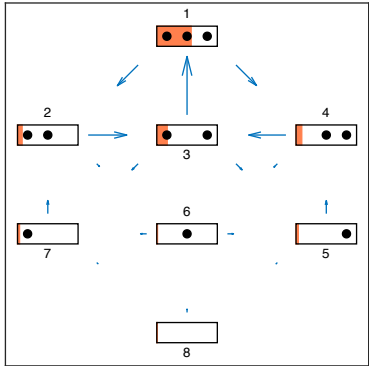

Supplement: supp [file elife-58394-supp-v1.zip]

**A**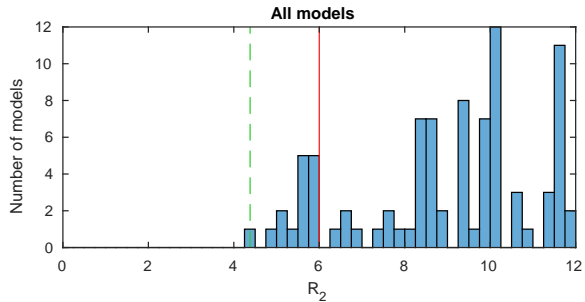**B**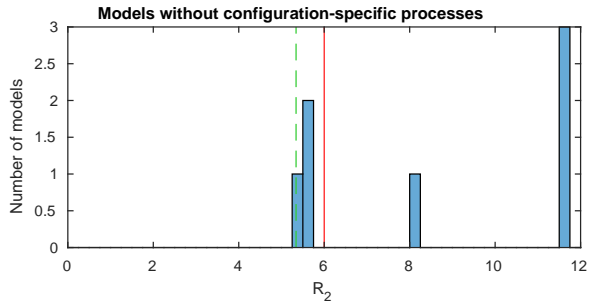**C**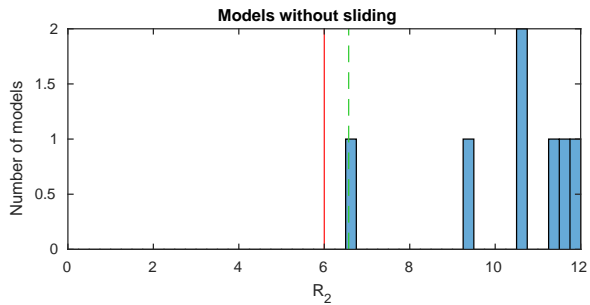**D**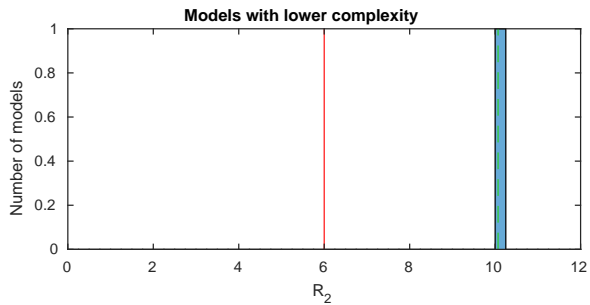

Supplement: supp [file elife-58394-supp-v1.zip]

Repressed

A

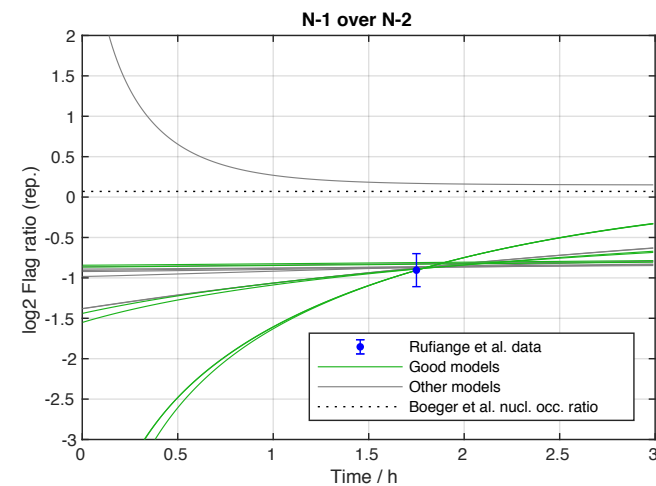

B

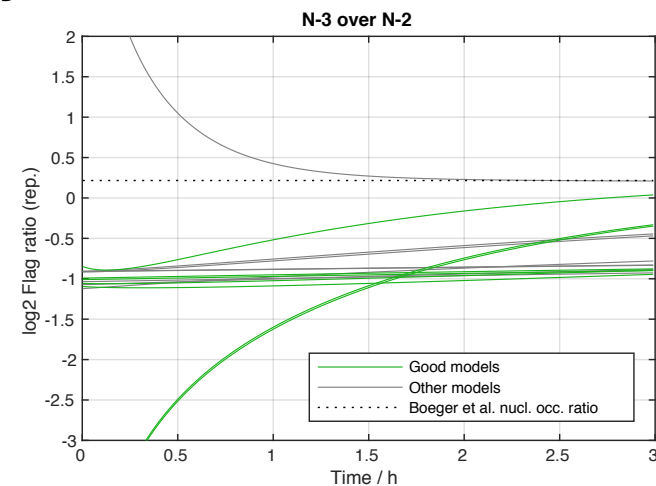

C

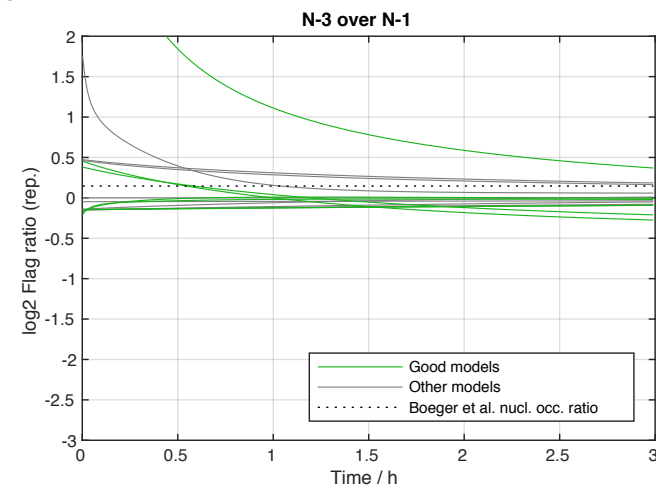

Activated

D

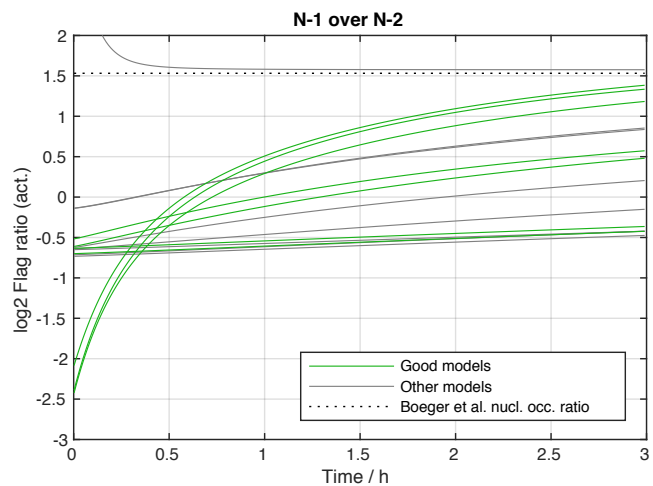

E

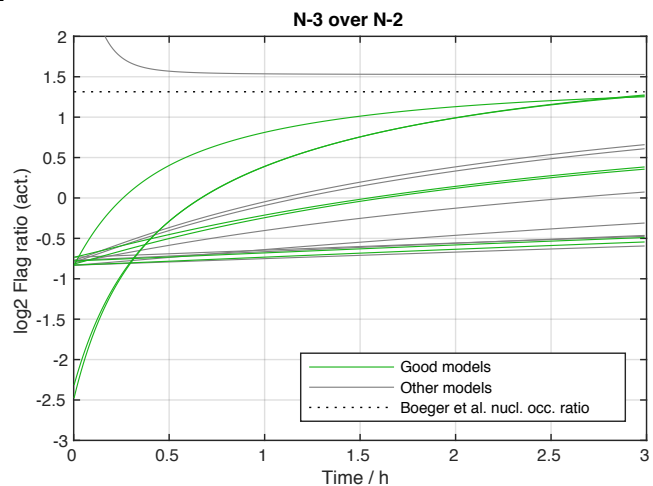

F

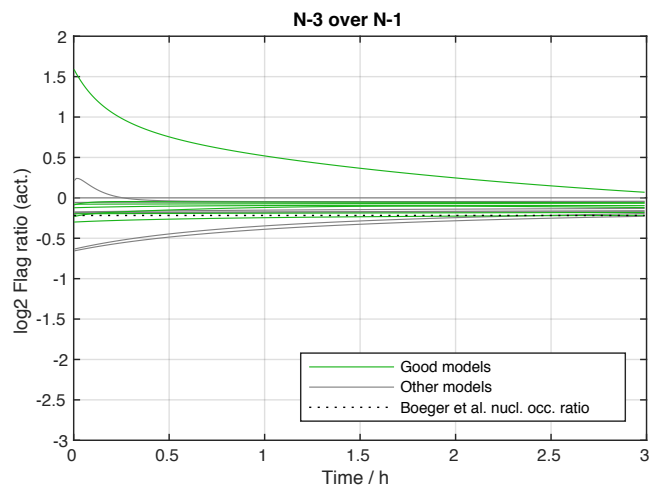

Supplement: supp [file elife-58394-supp-v1.zip]

**A****7 fitted parameters**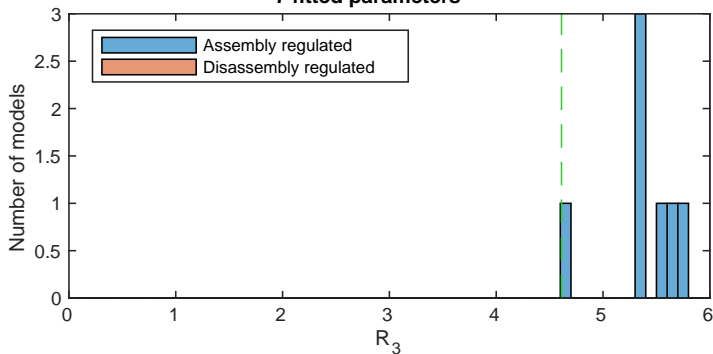**B****At most 8 fitted parameters**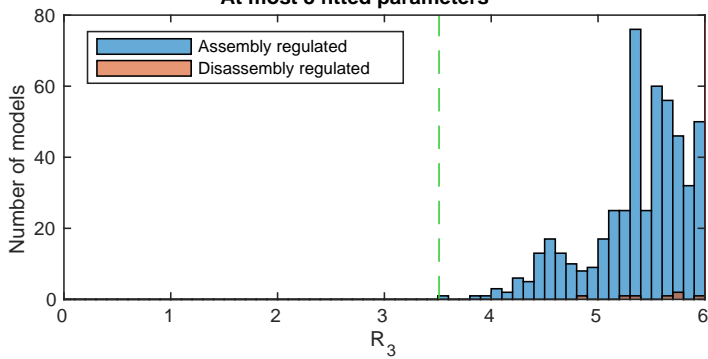

Supplement: supp [file elife-58394-supp-v1.zip]

## Group 1

65171, max = 0.048 / h

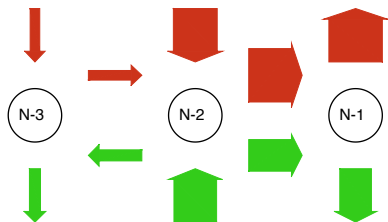

65166, max = 0.056 / h

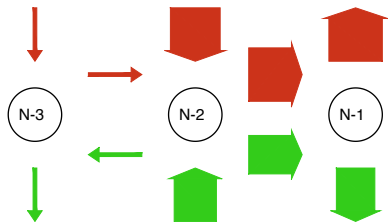

## Group 2

8166, max = 0.589 / h

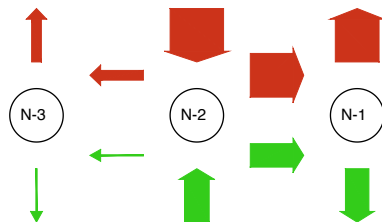

27443, max = 0.884 / h

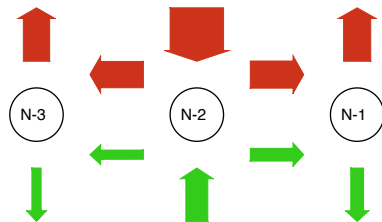

27448, max = 0.876 / h

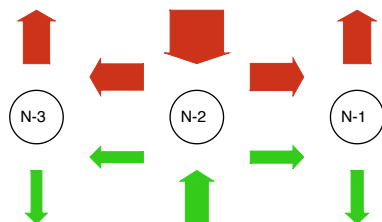

## Group 3

61116, max = 0.013 / h

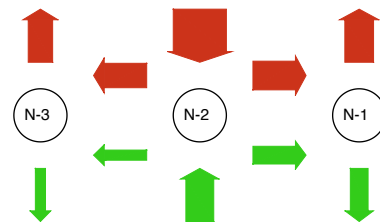

61121, max = 0.013 / h

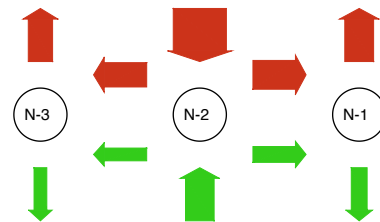

Supplement: supp [file elife-58394-supp-v1.zip]

### Group 1

**65171, max = 0.016 / h**

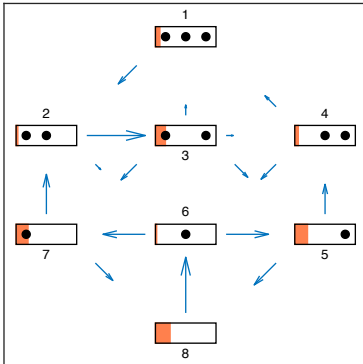

## Group 2

8166, max = 0.156 / h

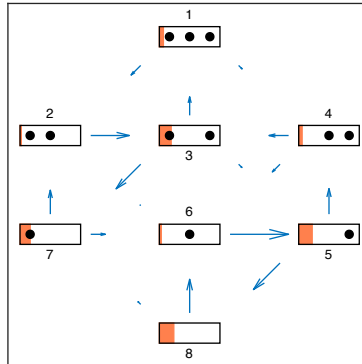

### Group 3

61116, max = 0.002 / h

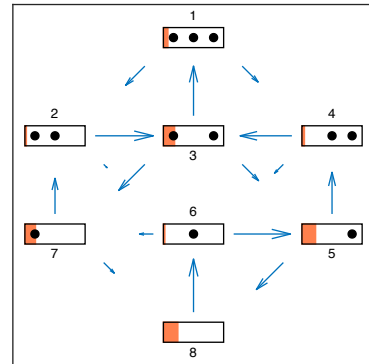

**65166, max = 0.023 / h**

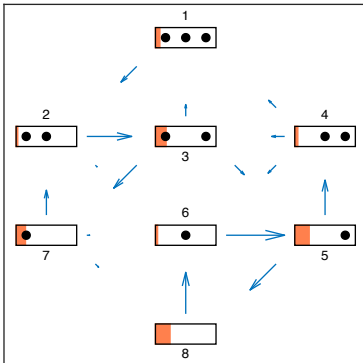

27443, max = 0.118 / h

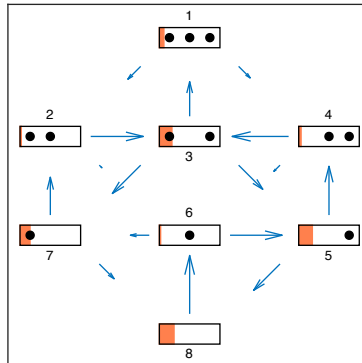

61121, max = 0.002 / h

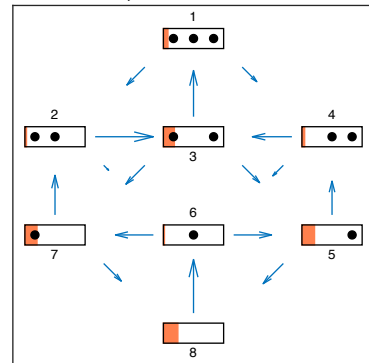

27448, max = 0.127 / h

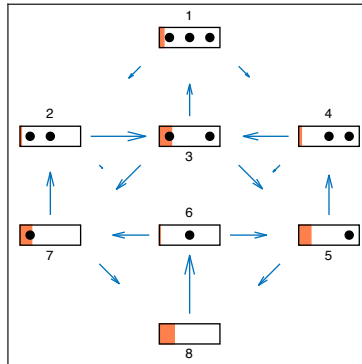

Supplement: supp [file elife-58394-supp-v1.zip]

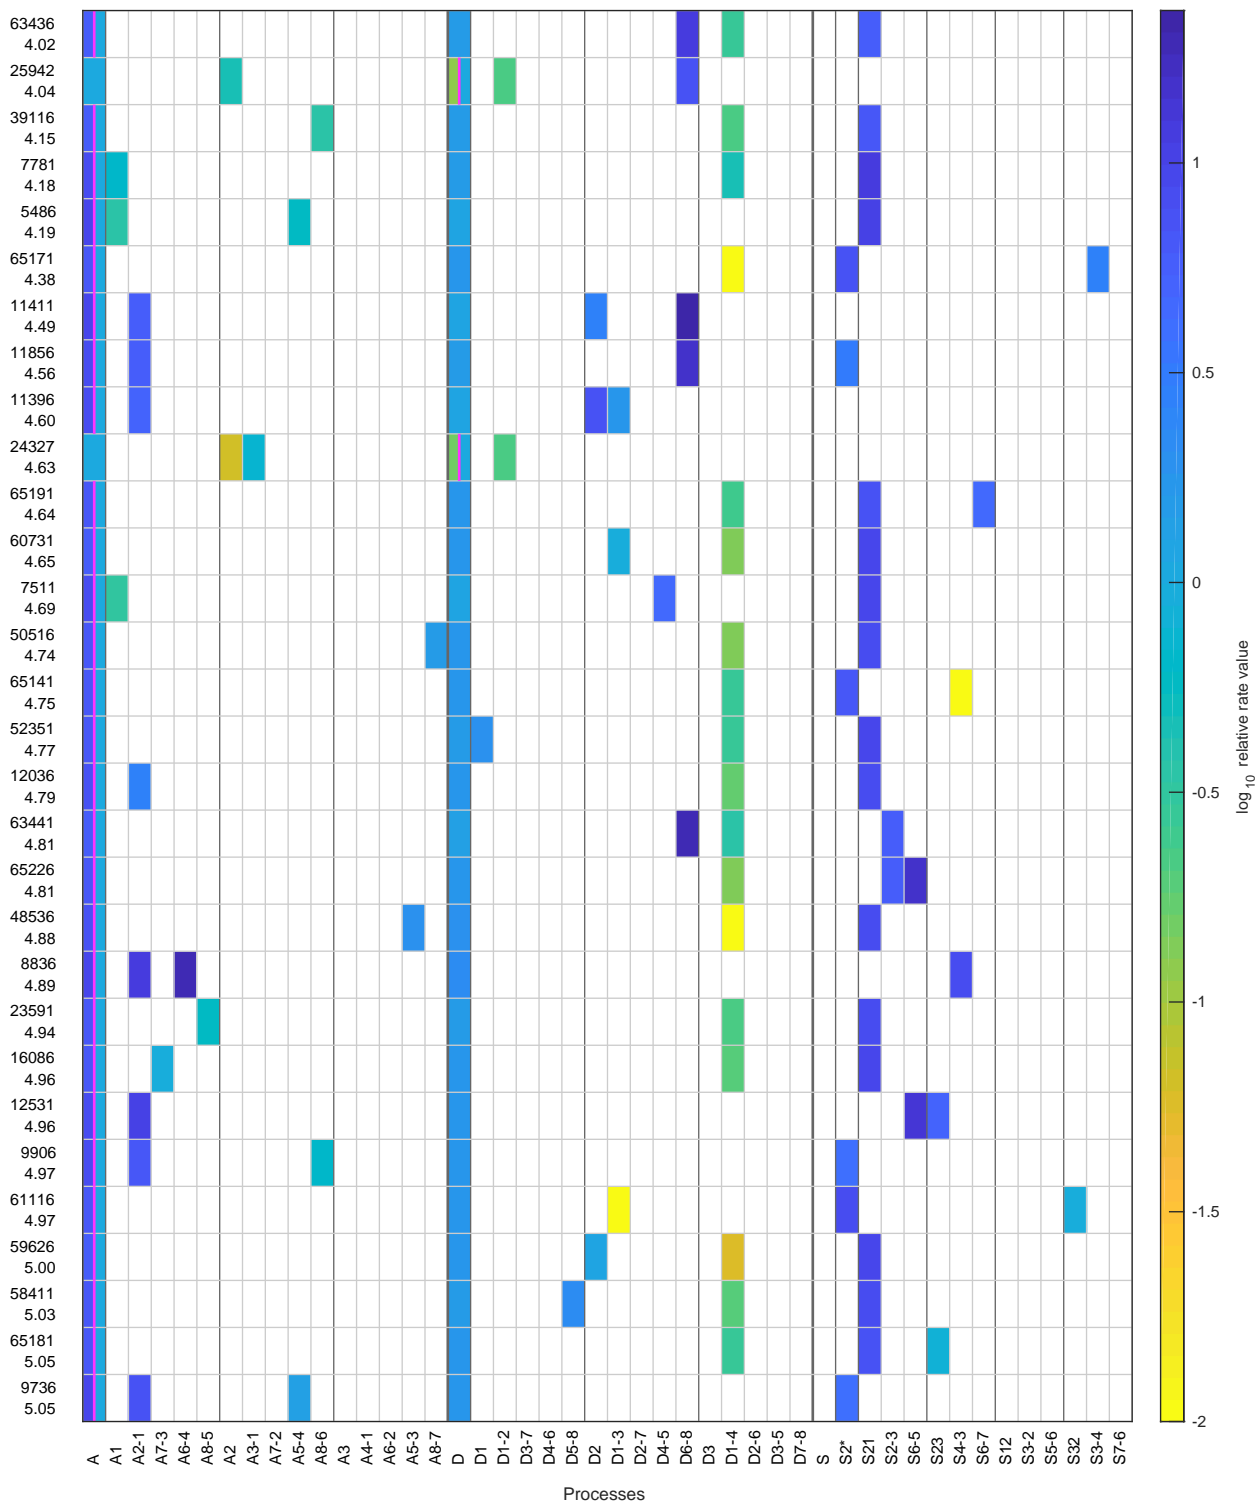

Supplement: supp [file elife-58394-supp-v1.zip]

Group 1

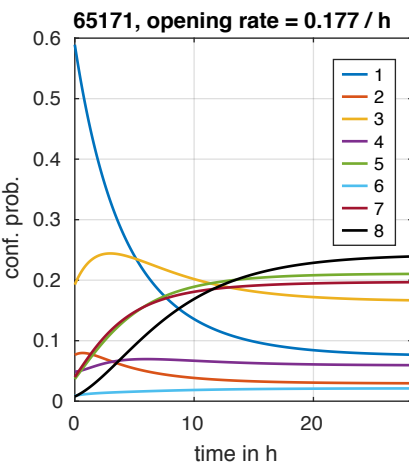

Group 2

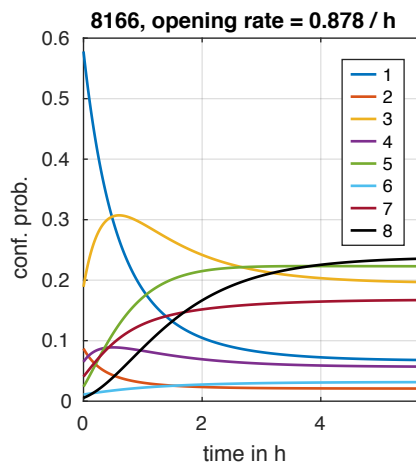

Group 3

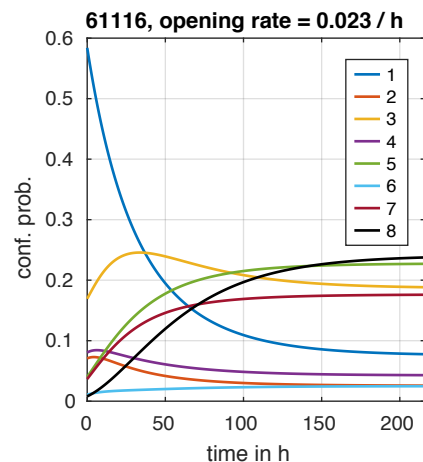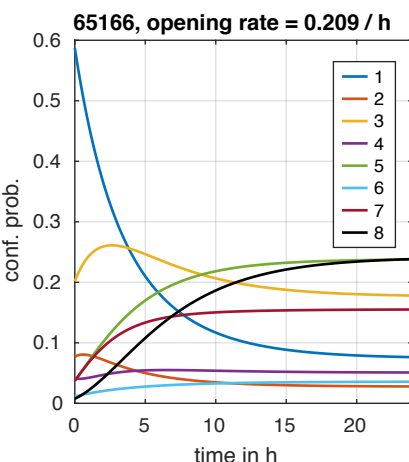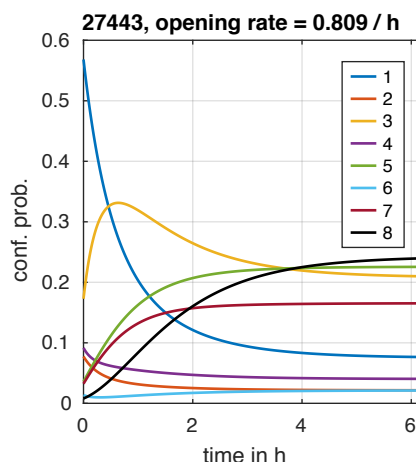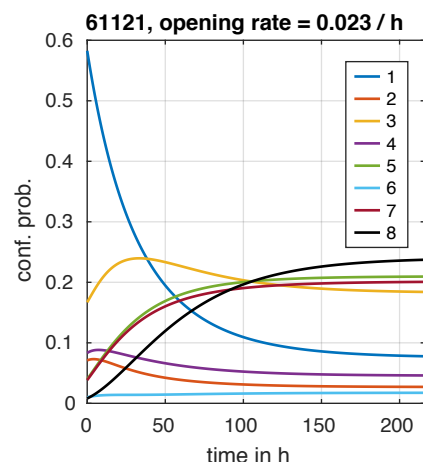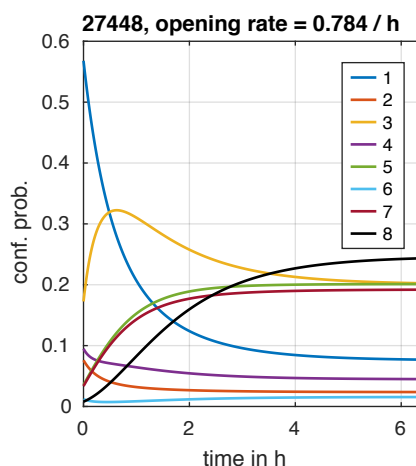

Supplement: supp [file elife-58394-supp-v1.zip]

# Sticky mutant 1

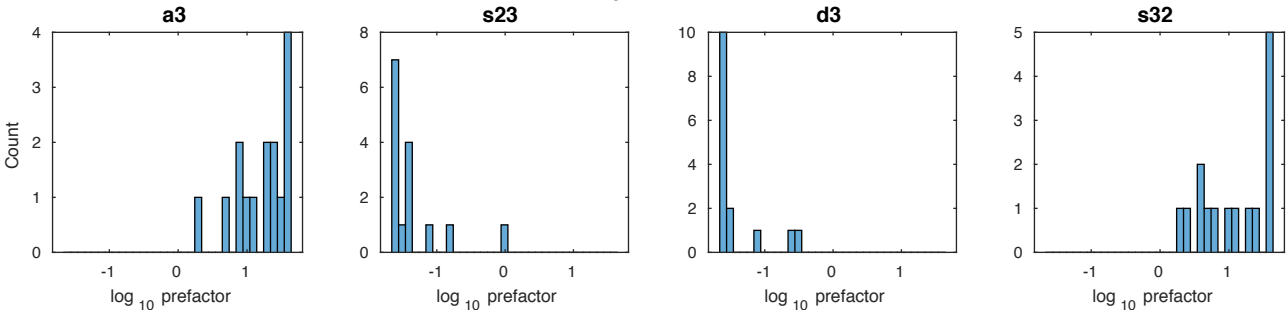

# Sticky mutant 2

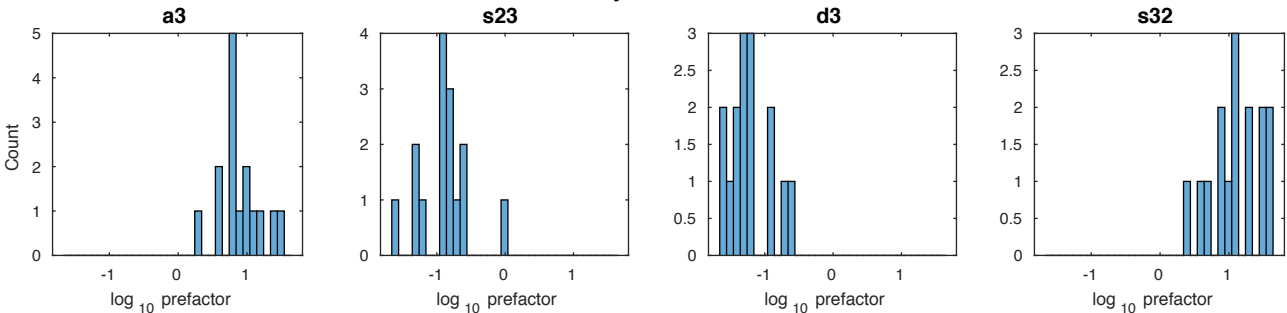

Supplement: supp [file elife-58394-supp-v1.zip]

**A**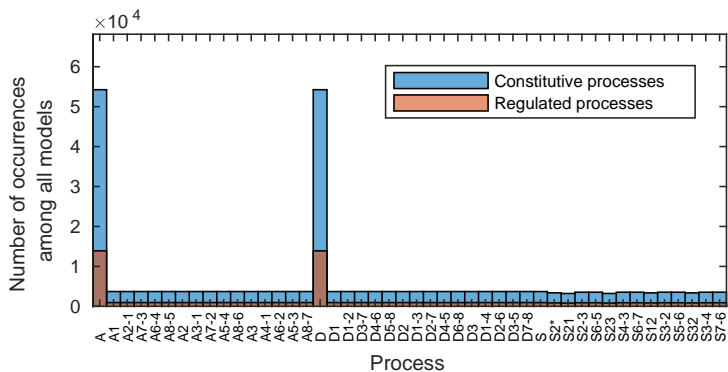**B**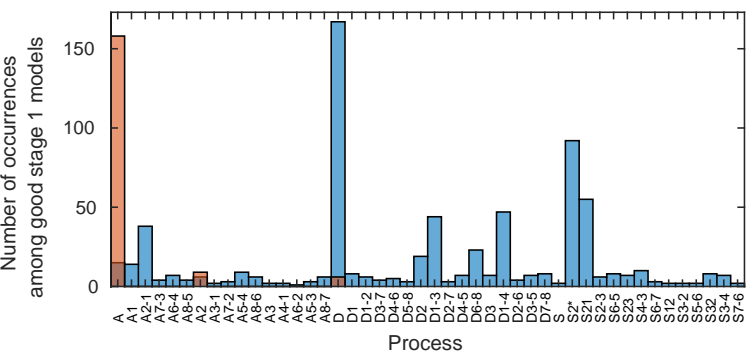**C**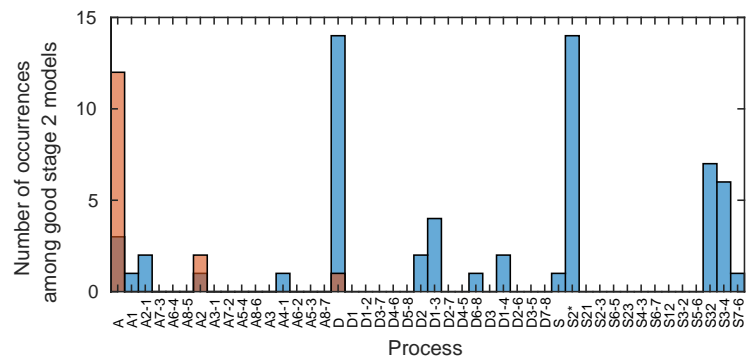**D**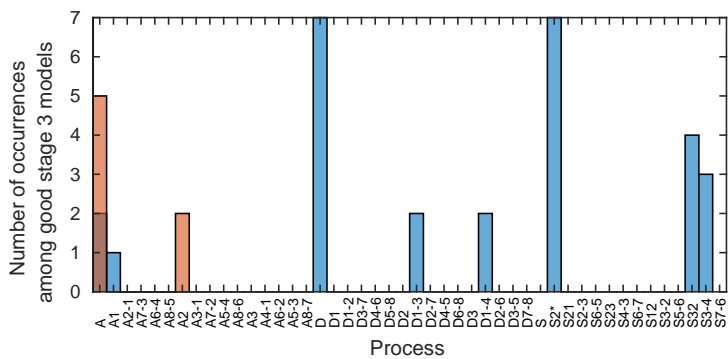

Supplement: supp [file elife-58394-supp-v1.zip]

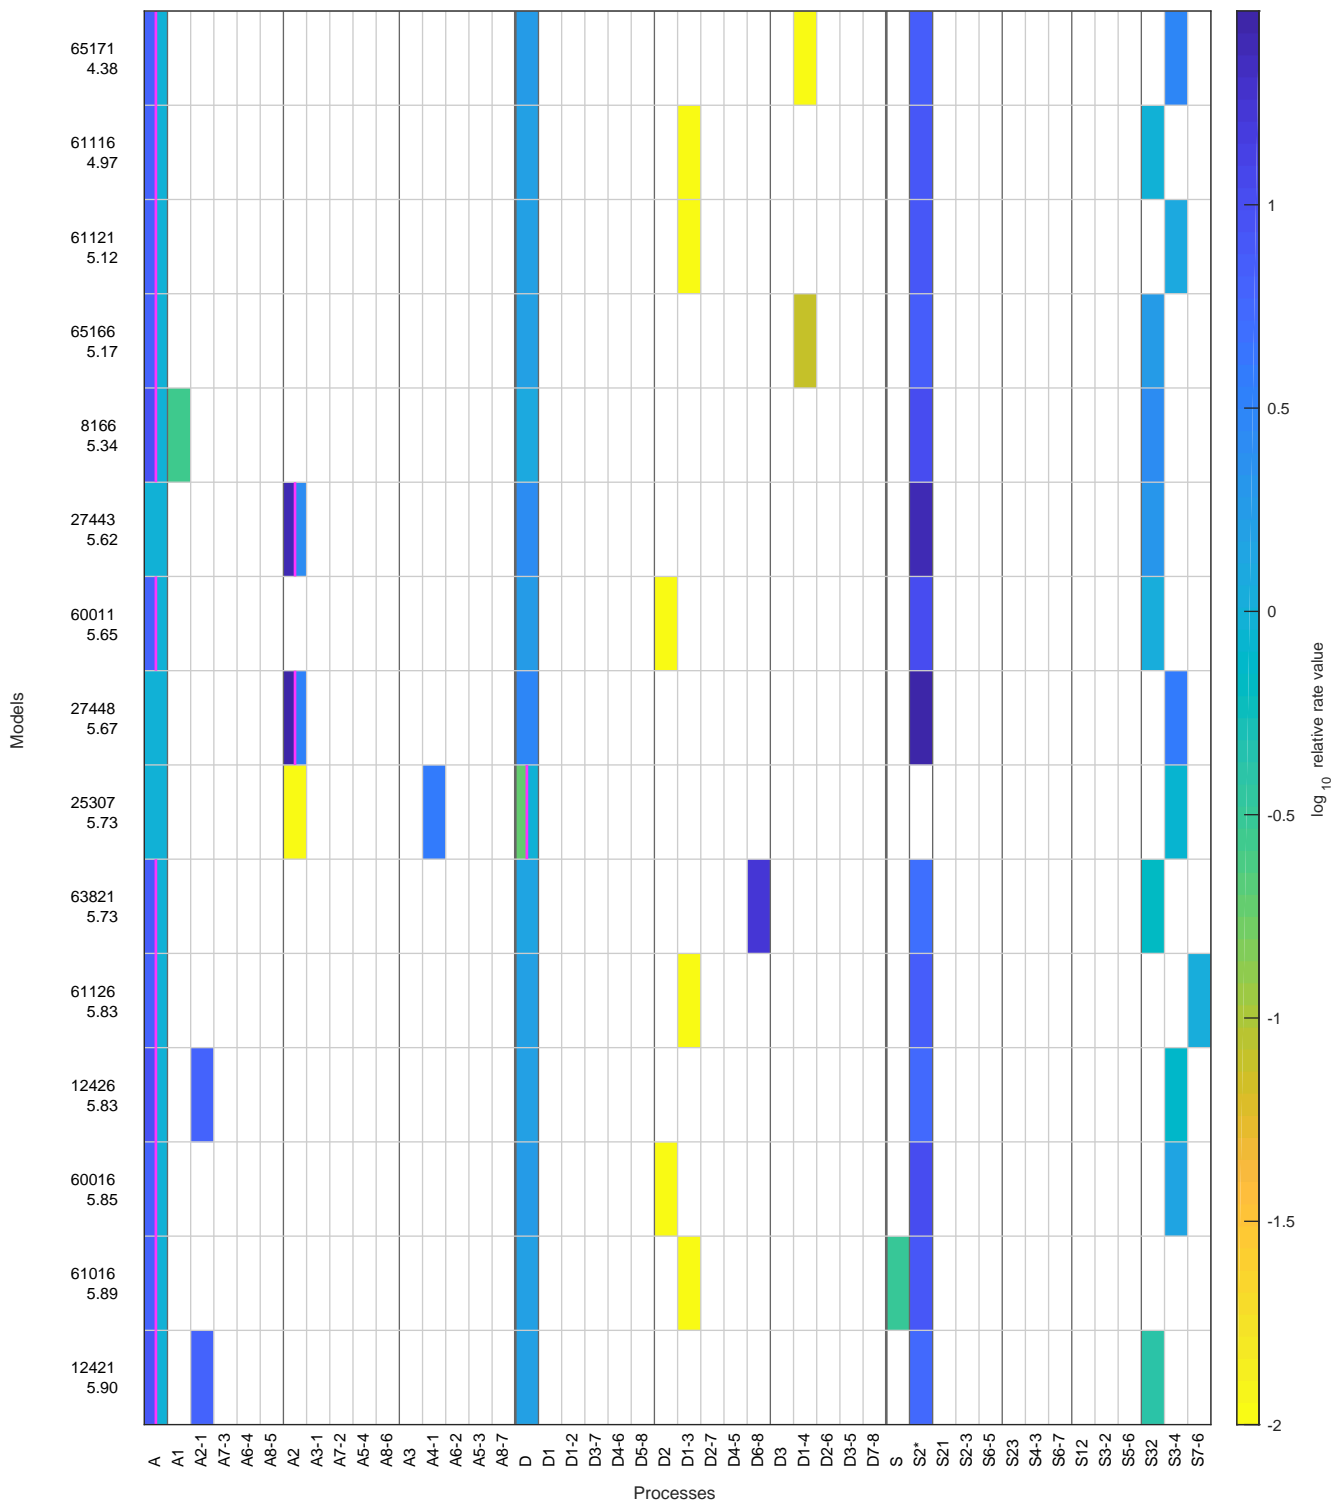

Supplement: supp [file elife-58394-supp-v1.zip]

Group 1

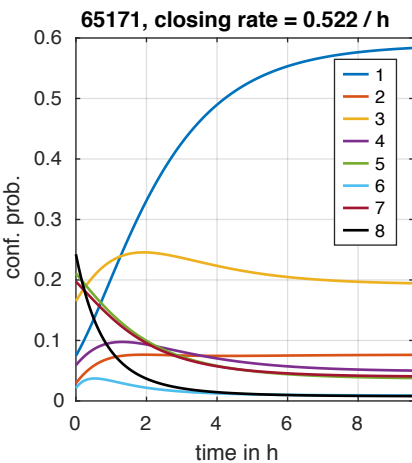

Group 2

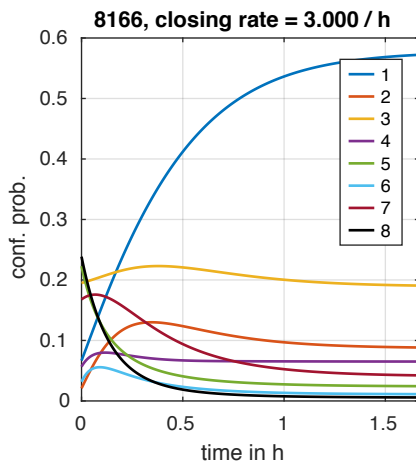

Group 3

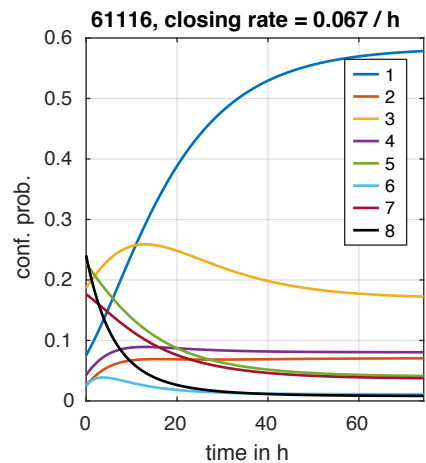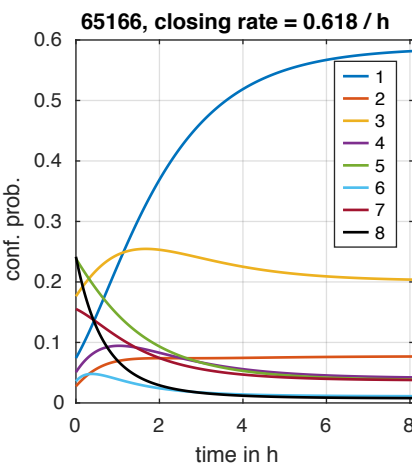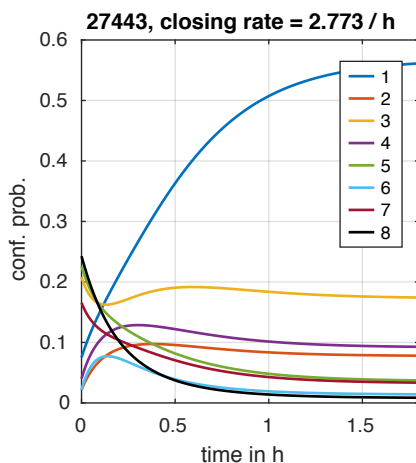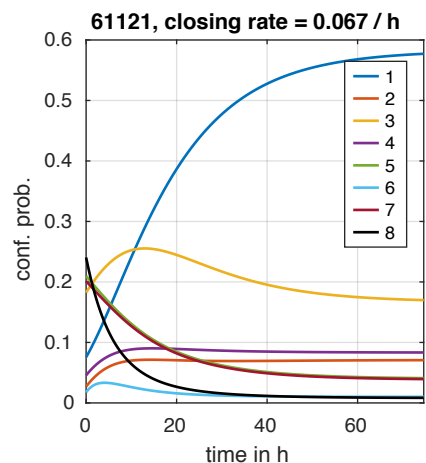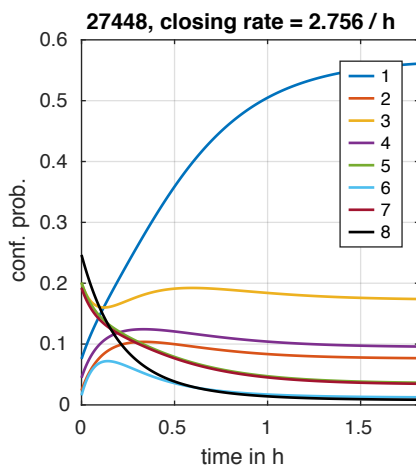

Supplement: supp [file elife-58394-supp-v1.zip]

## Group 1

65171, max = 0.092 / h

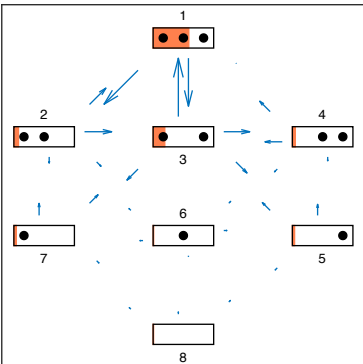

## Group 2

8166, max = 0.745 / h

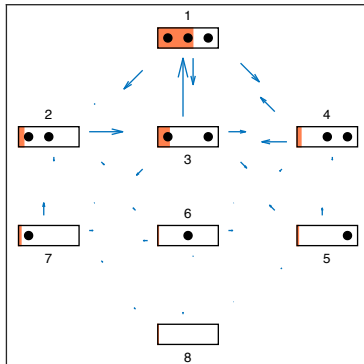

### Group 3

**61116, max = 0.010 / h**

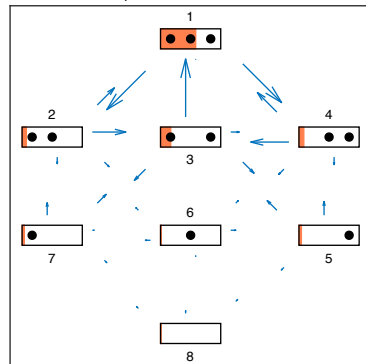

65166, max = 0.114 / h

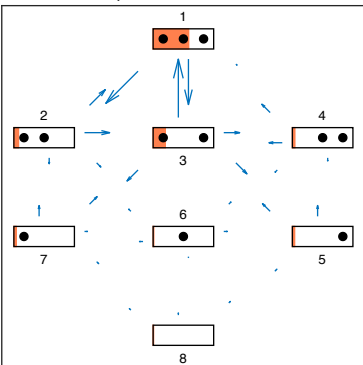

**27443, max = 0.898 / h**

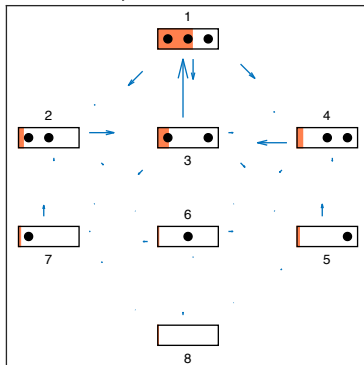

61121, max = 0.010 / h

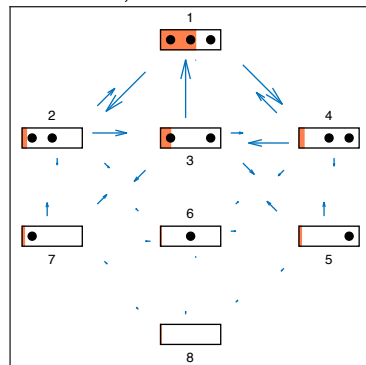

27448, max = 0.885 / h

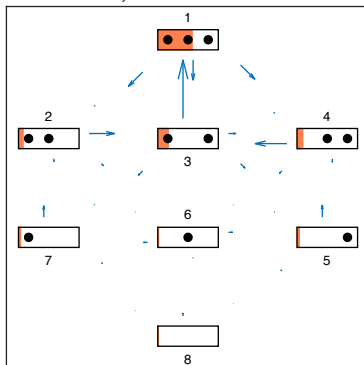

Supplement: supp [file elife-58394-supp-v1.zip]

$\log_{10}$  time scale / h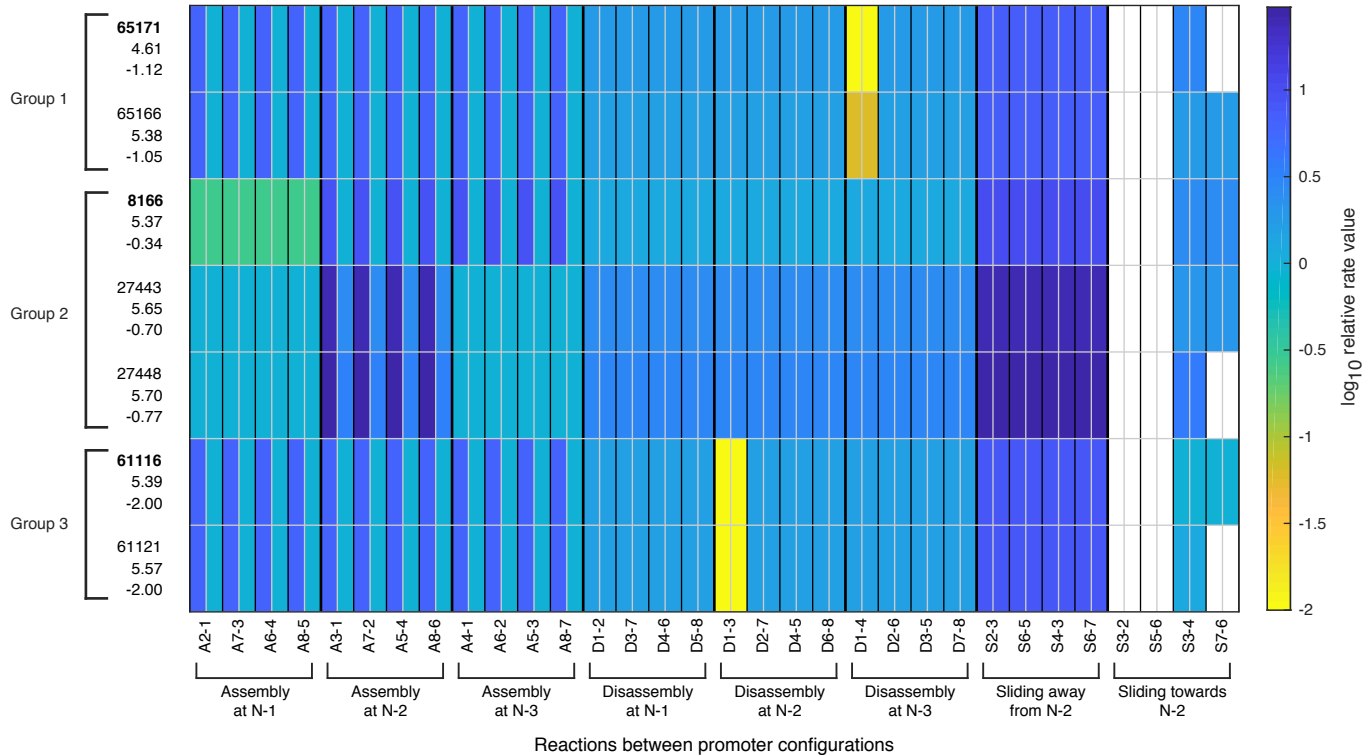

Supplement: supp [file elife-58394-supp-v1.zip]

## Group 1

65171, max = 0.035 / h

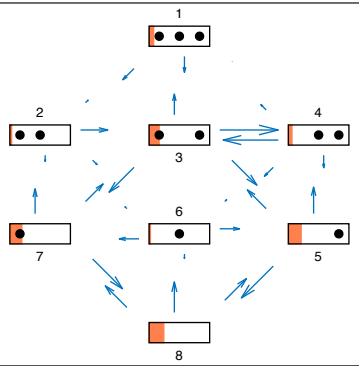

## Group 2

8166, max = 0.279 / h

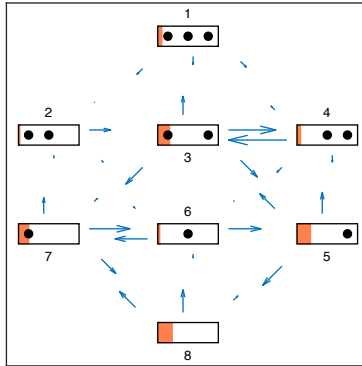

## Group 3

61116, max = 0.004 / h

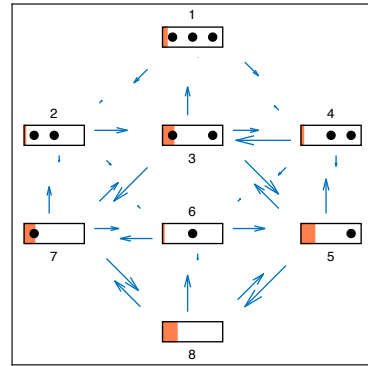

65166, max = 0.036 / h

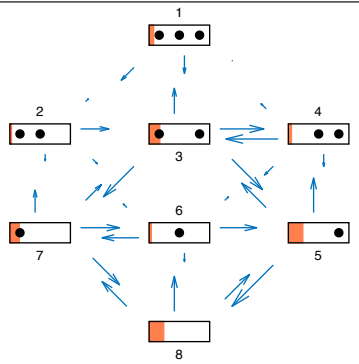

27443, max = 0.198 / h

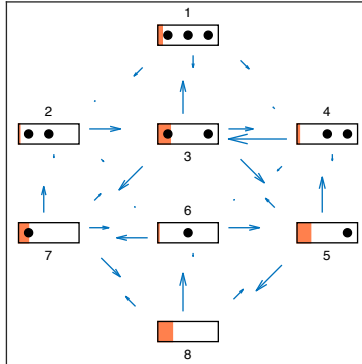

61121, max = 0.004 / h

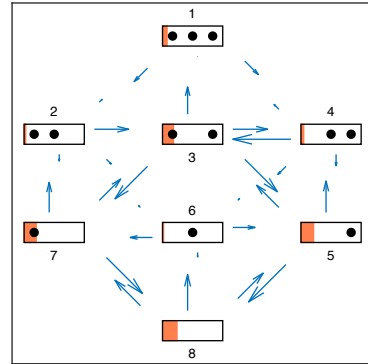

27448, max = 0.225 / h

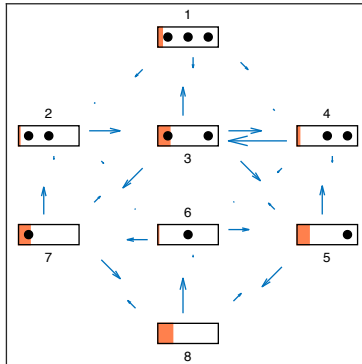

Supplement: supp [file elife-58394-supp-v1.zip]

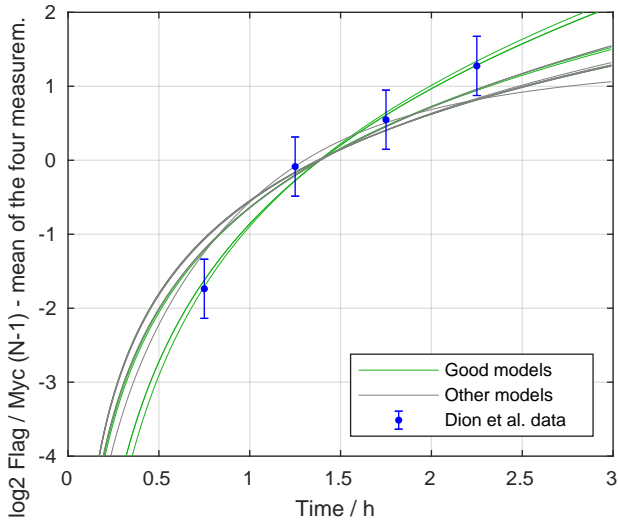

Supplement: supp [file elife-58394-supp-v1.zip]

**A**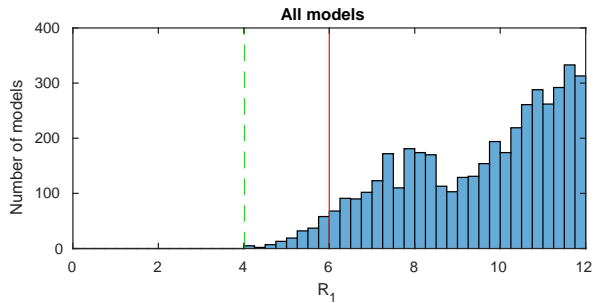**B**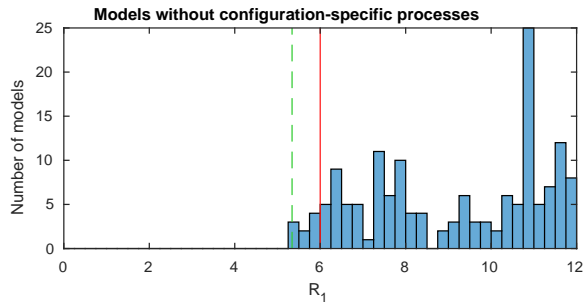**C**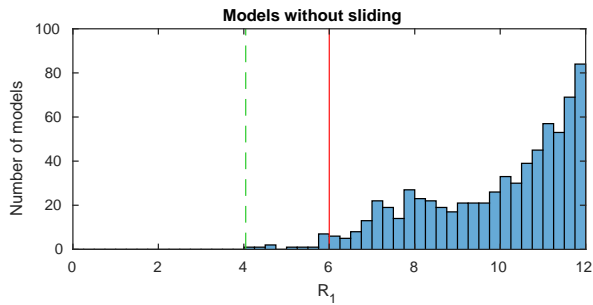**D**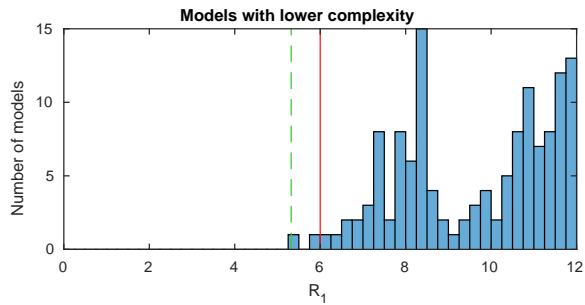

Supplement: supp [file elife-58394-supp-v1.zip]

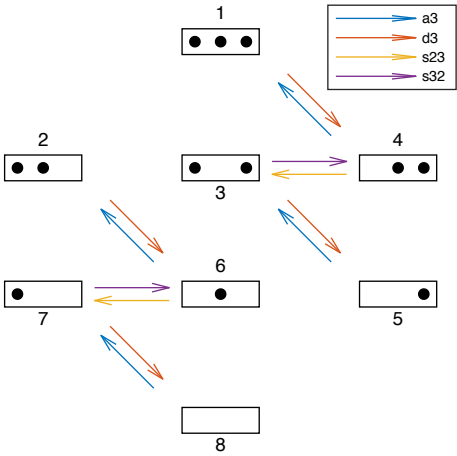

Supplement: supp [file elife-58394-supp-v1.zip]
